# Supplementary material
Source: publisher figshare collection journal article supplement (https://acs.figshare.com/ndownloader/files/5779110)

## SUPPLEMENTARY MATERIAL

### SYNTHESIS OF THE C<sub>1</sub>'-C<sub>11</sub>' SEGMENT OF LEUCASCANDROLIDE A

Peter Wipf\* and Thomas H. Graham

Department of Chemistry, University of Pittsburgh, Pittsburgh, Pennsylvania 15260

[pwipf+@pitt.edu](mailto:pwipf+@pitt.edu)

<sup>1</sup>H and <sup>13</sup>C NMR spectra for all new compounds.

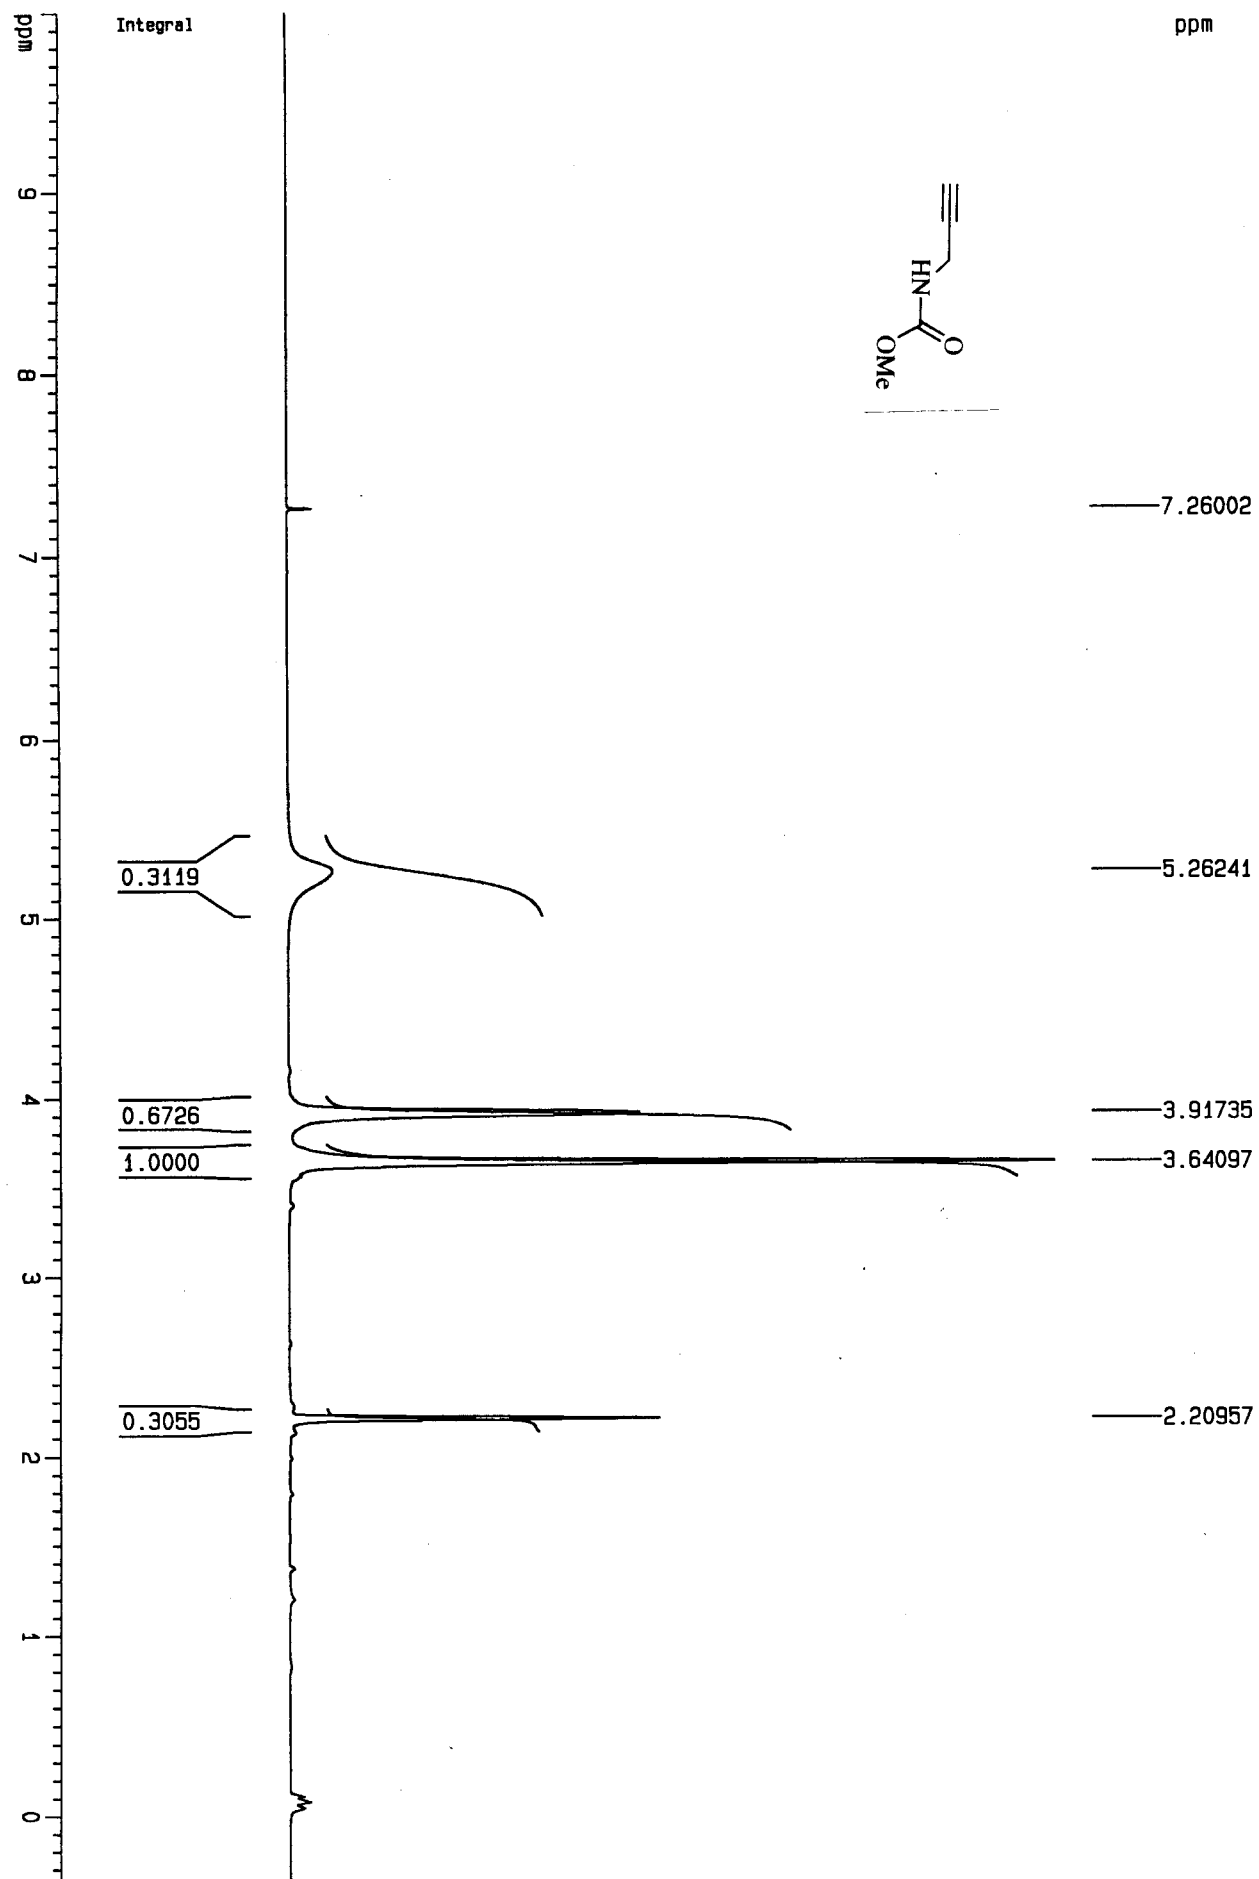

ppm

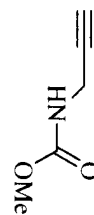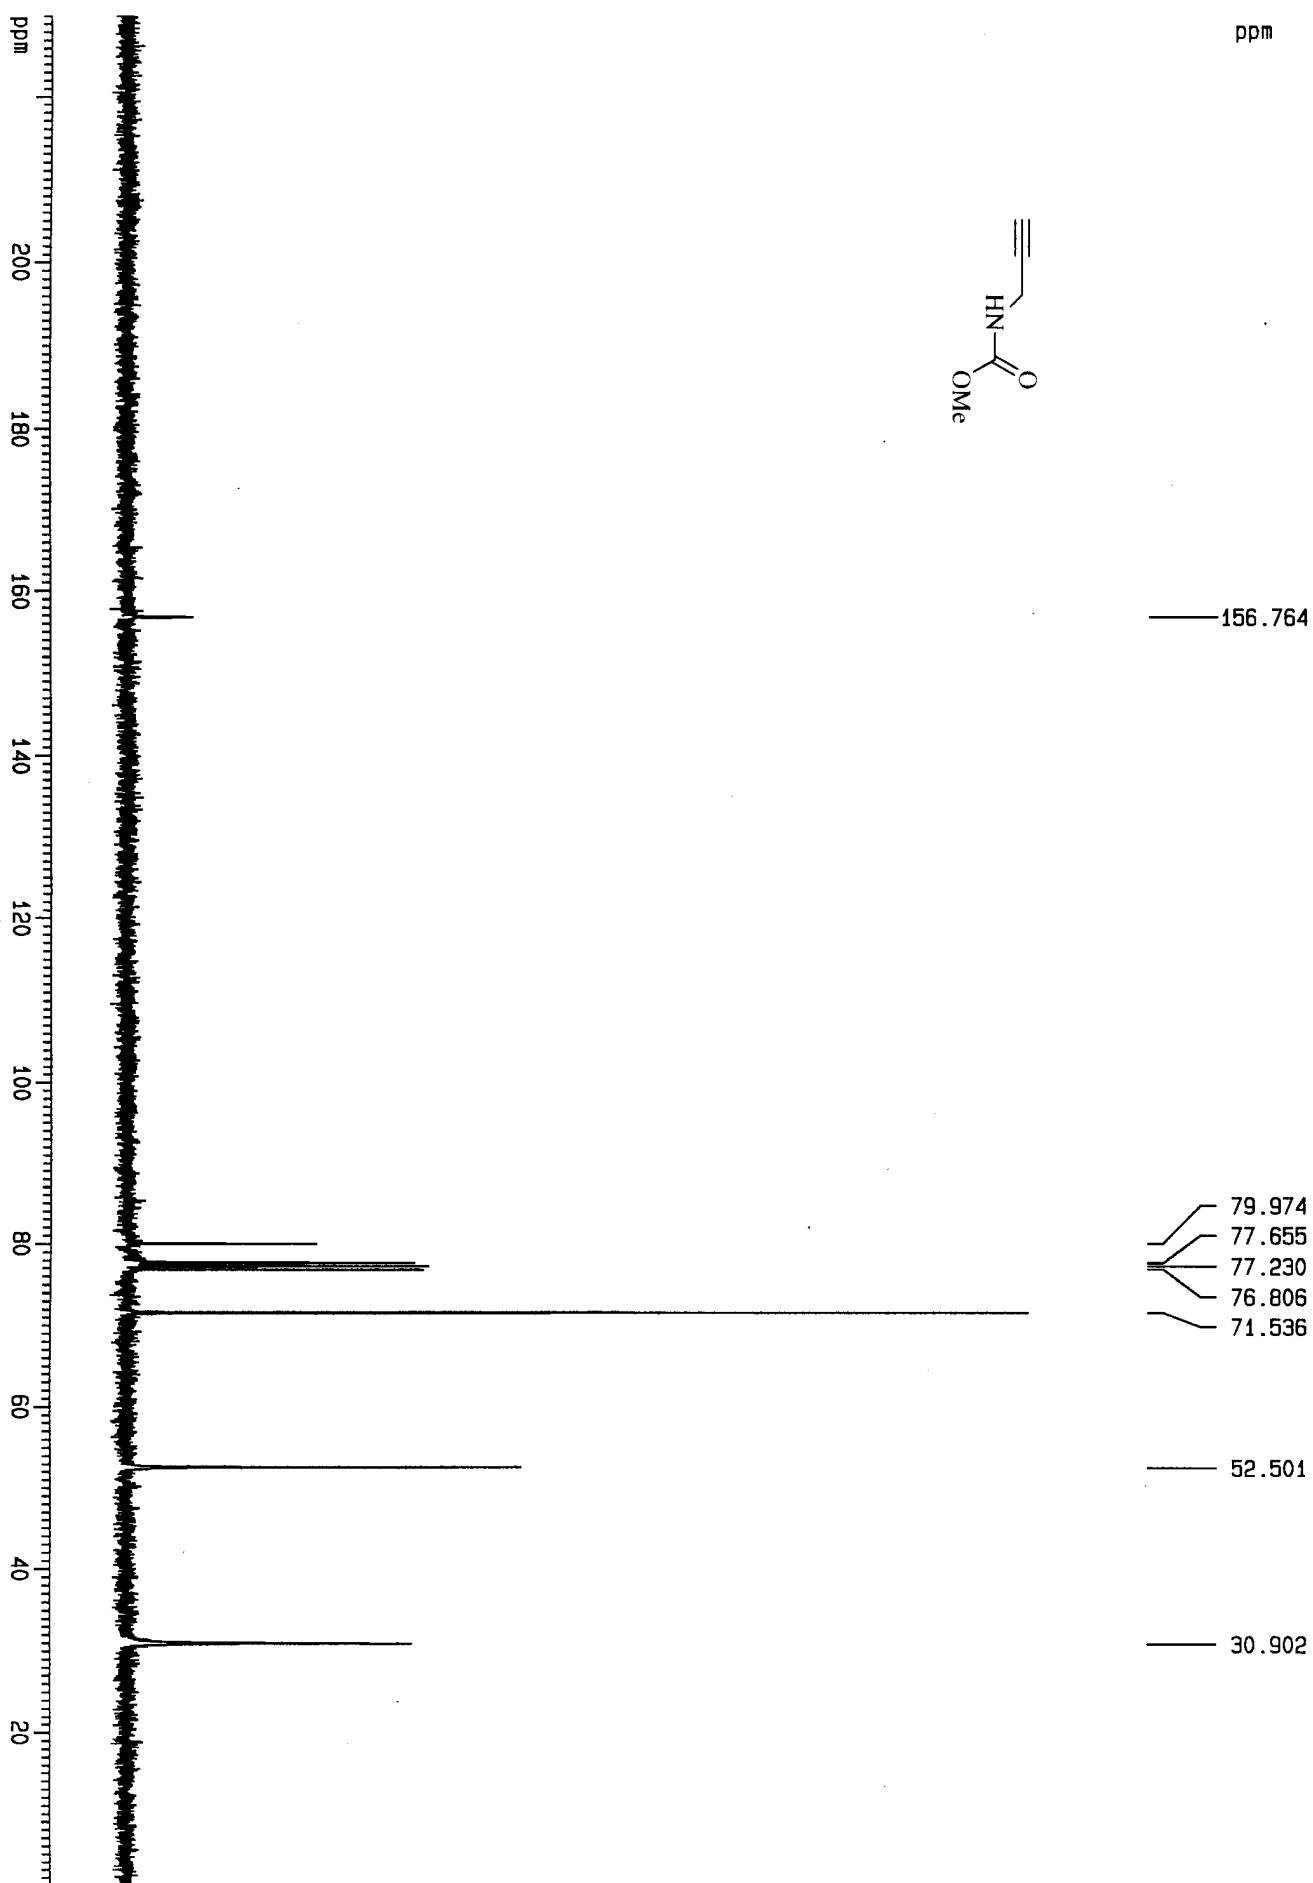

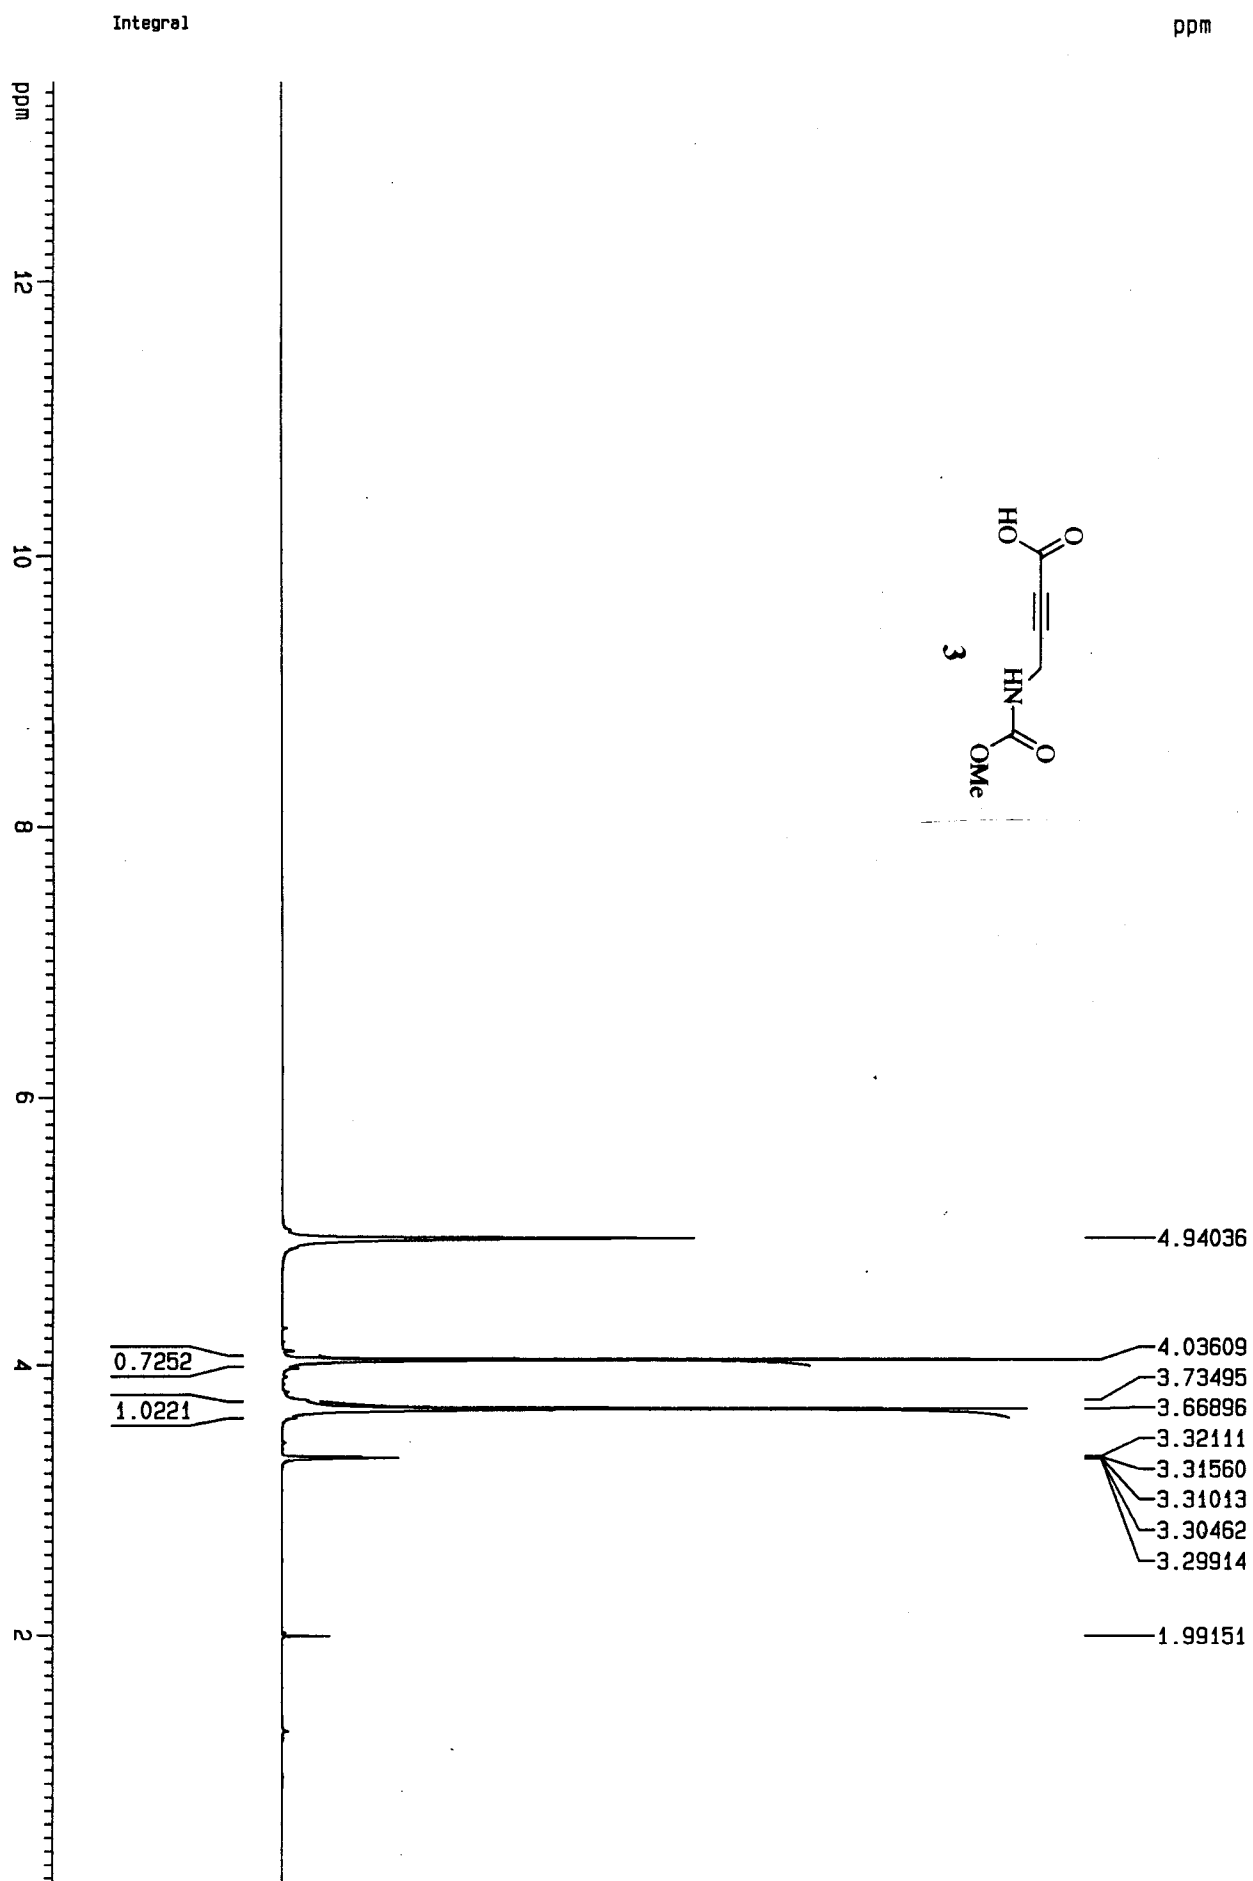

ppm

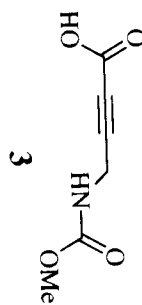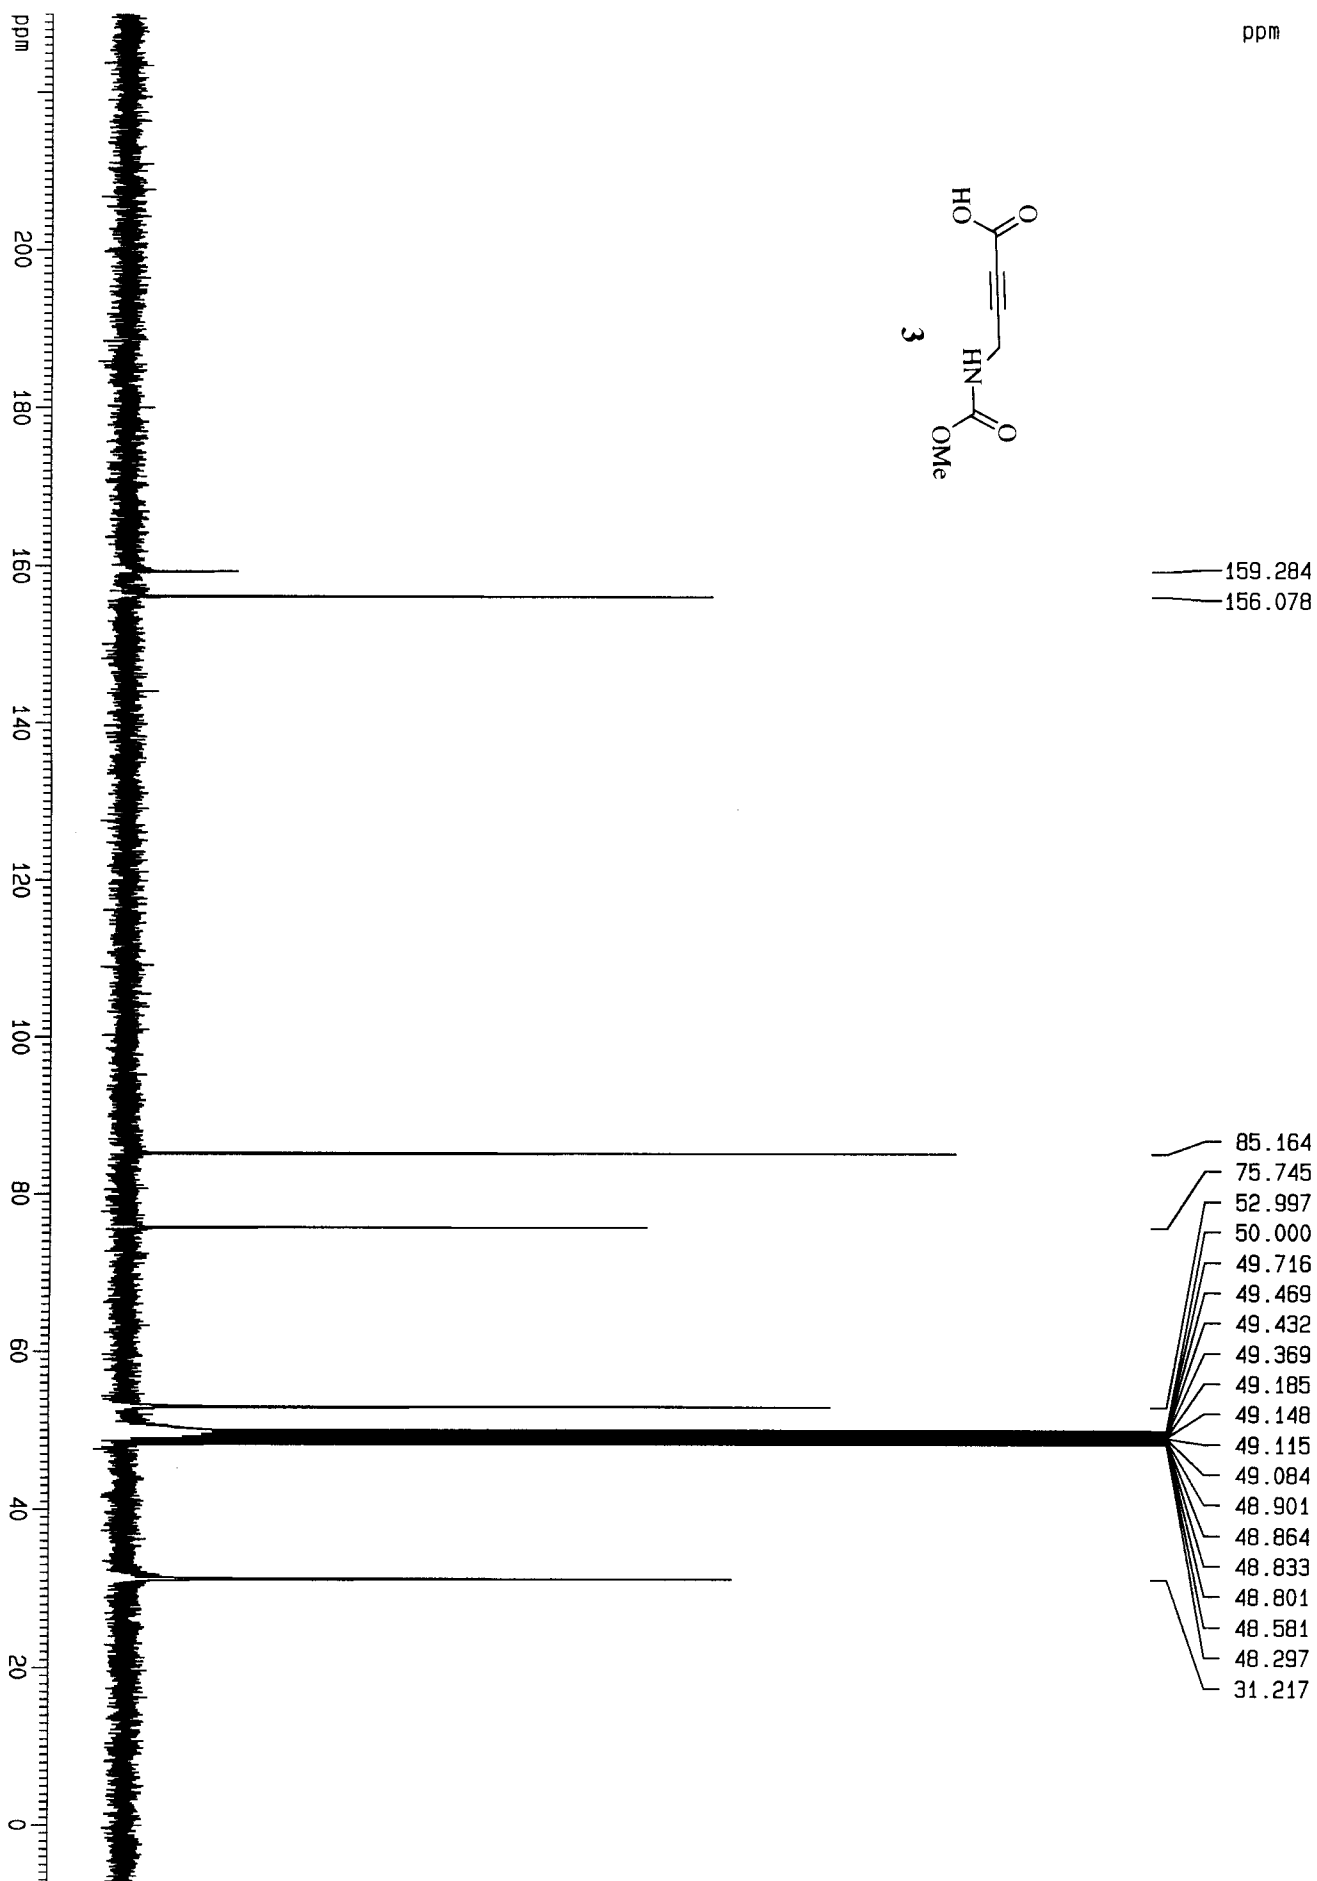

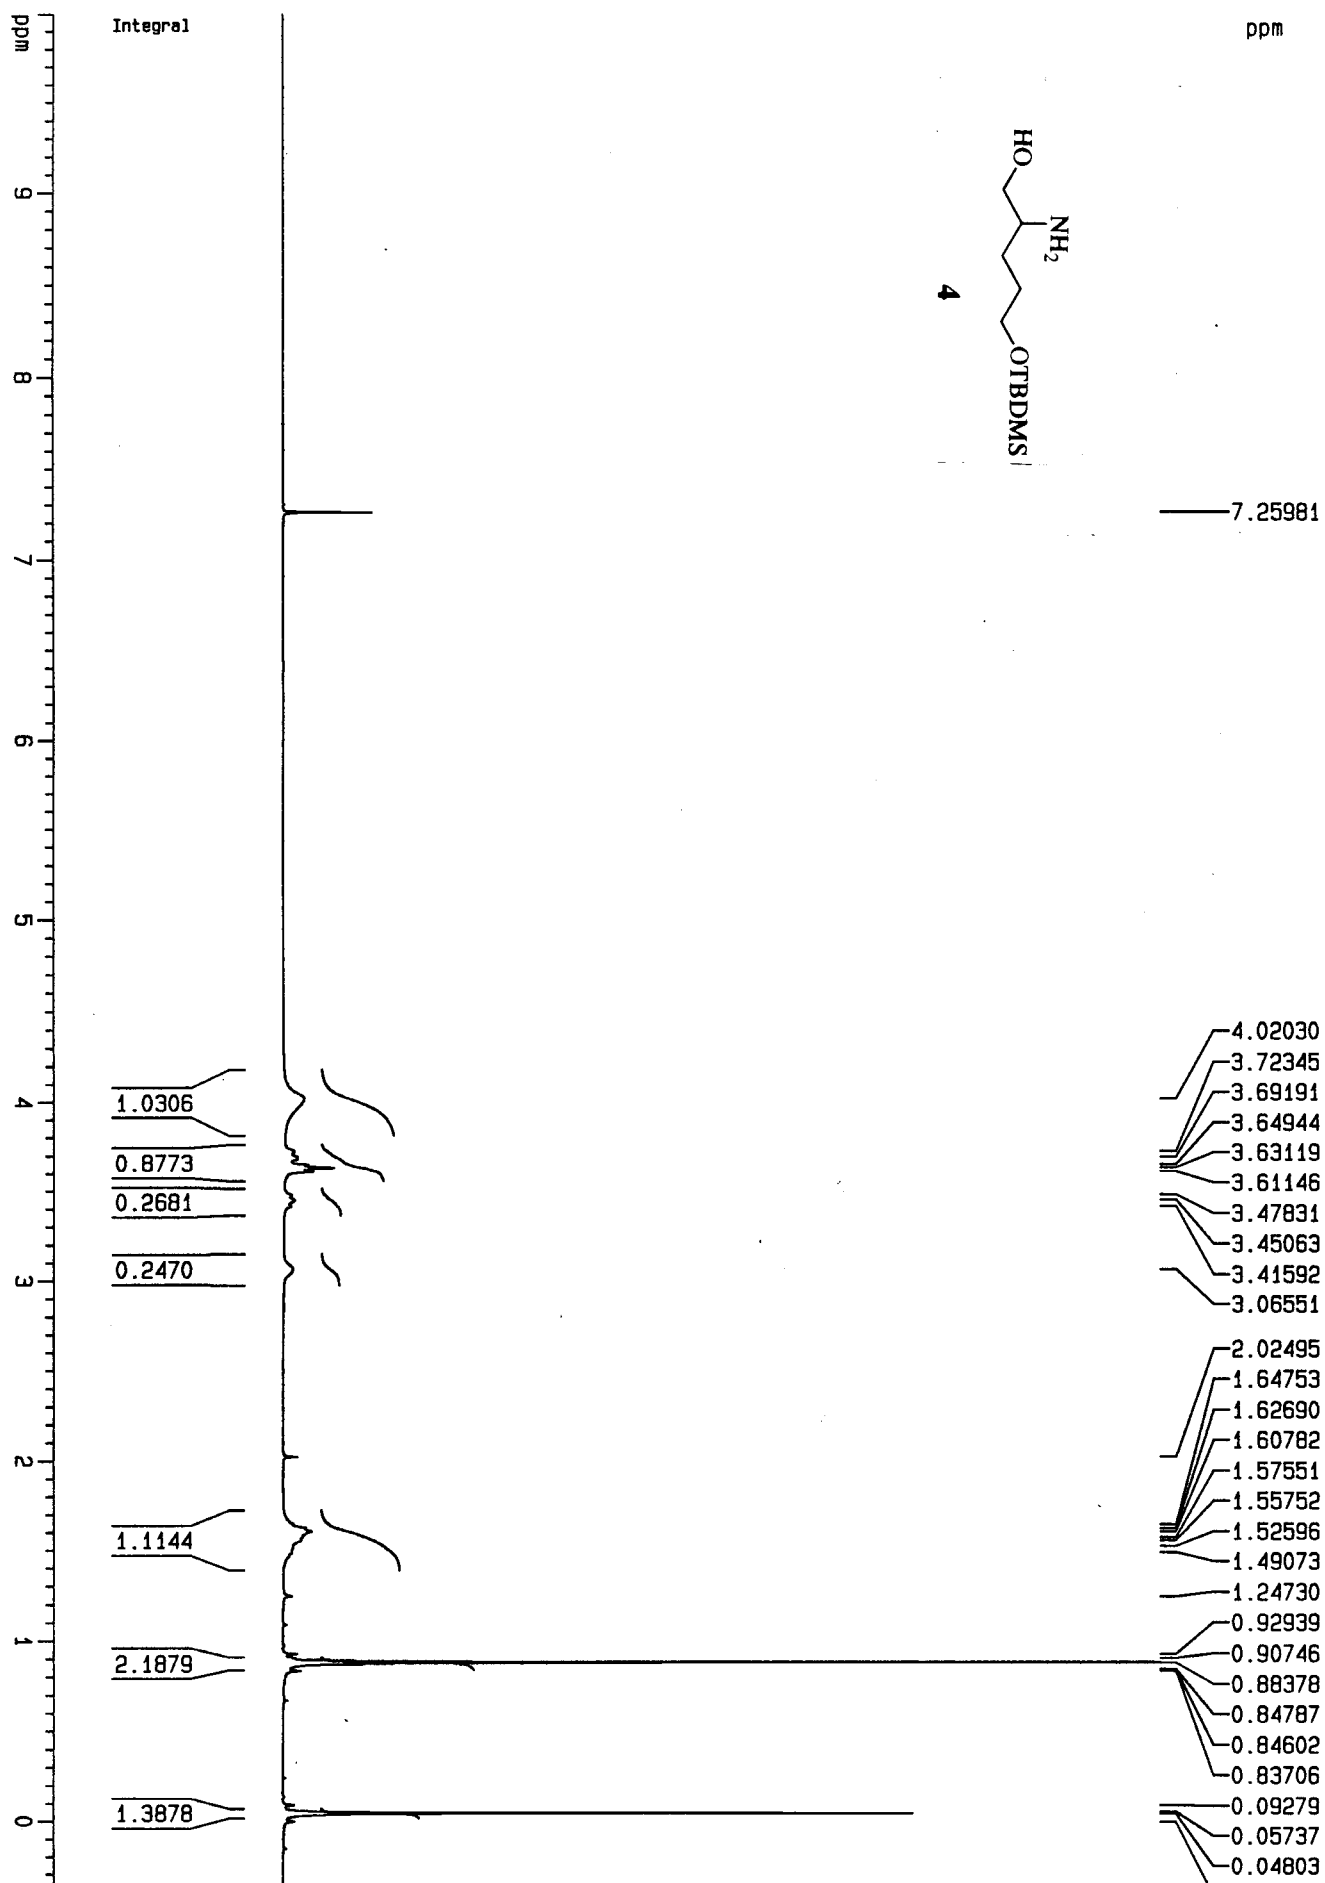

ppm

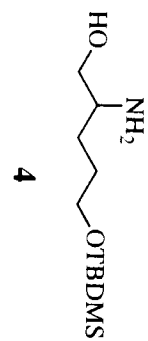

4

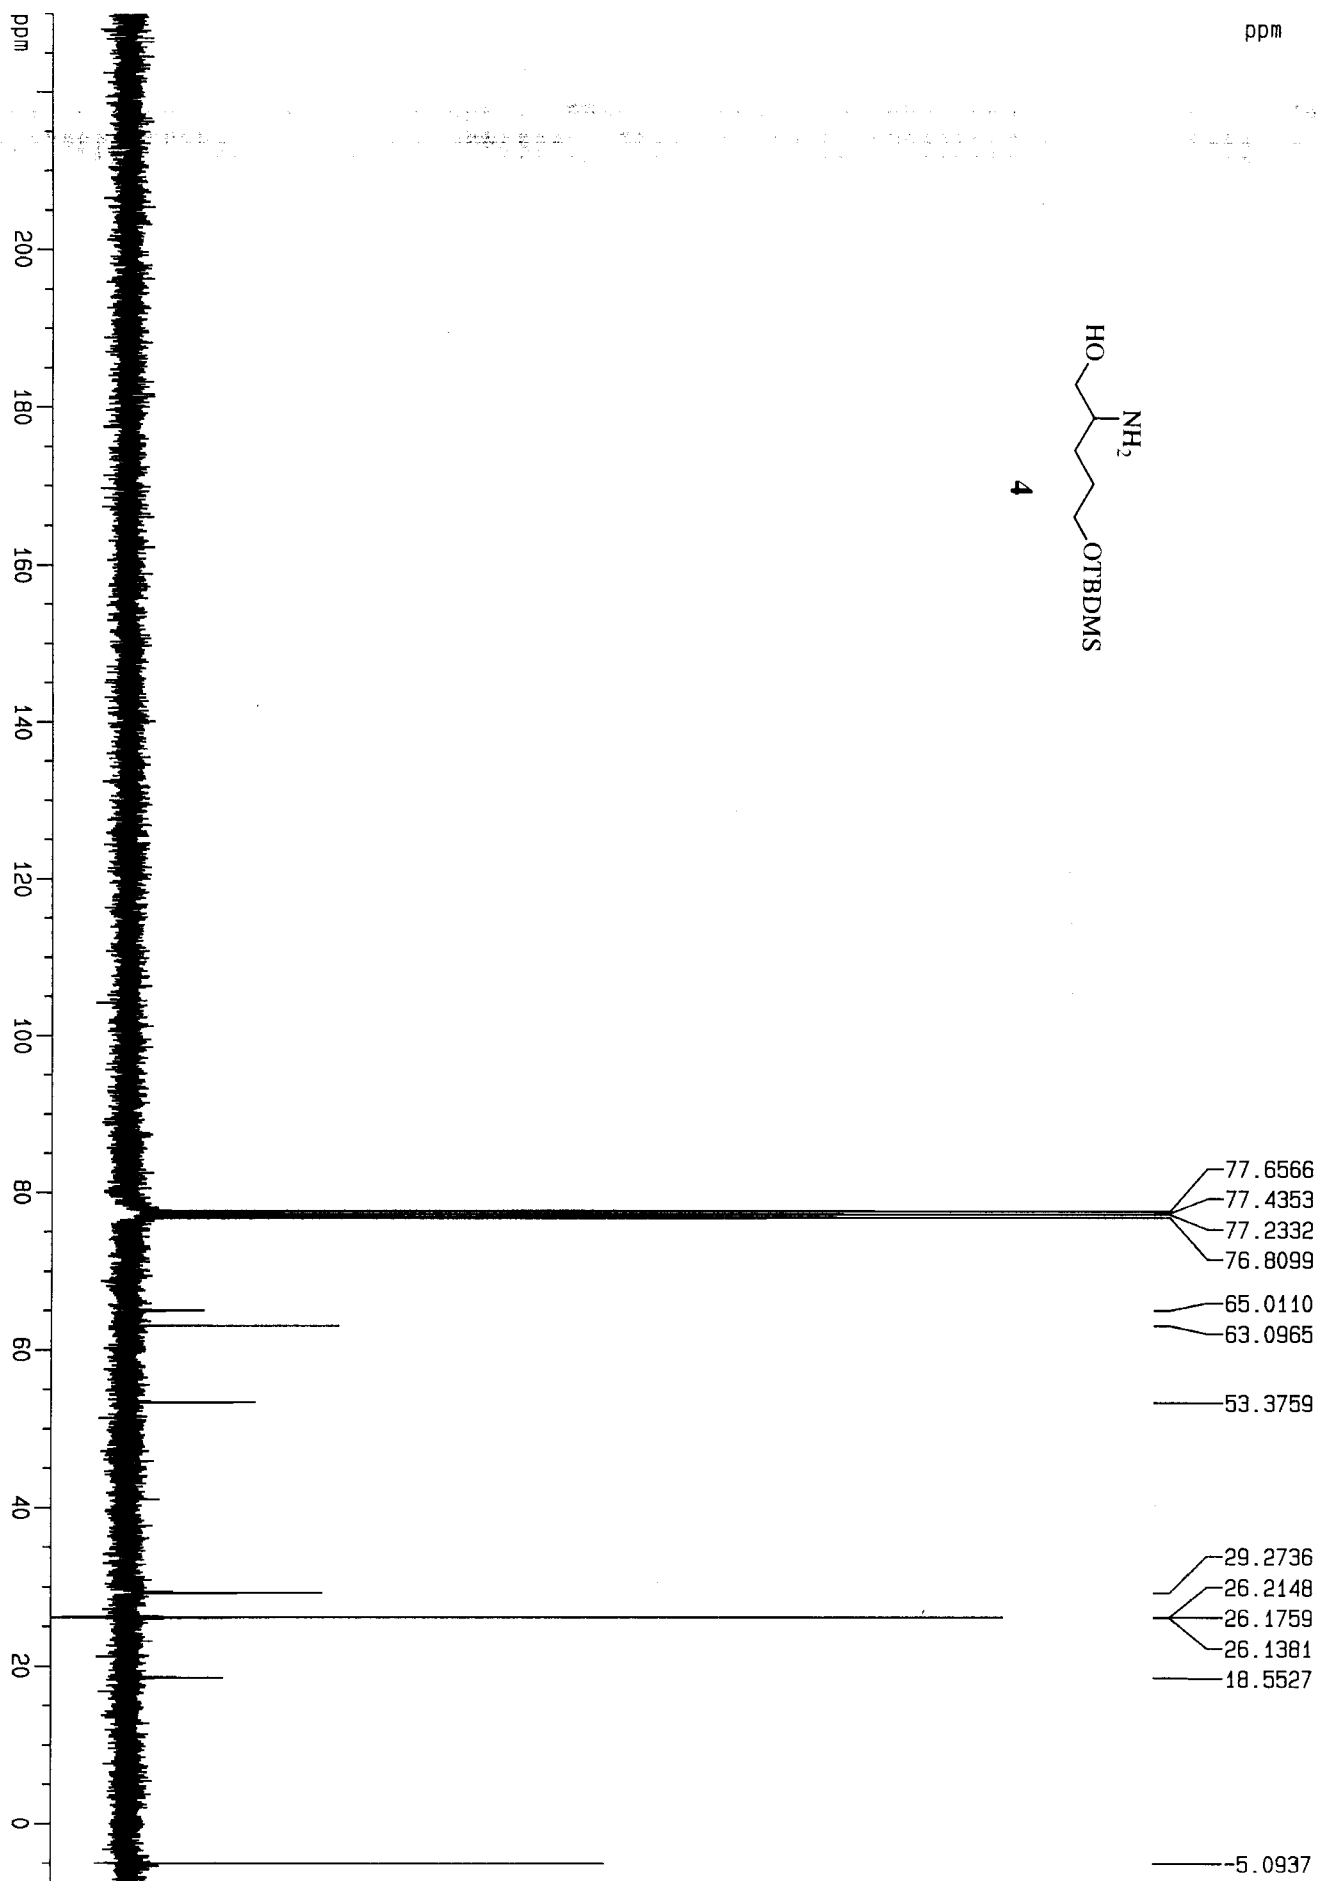

ppm

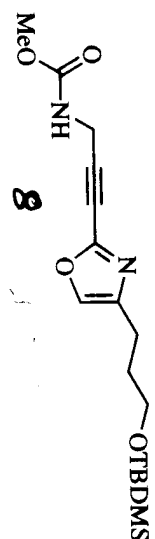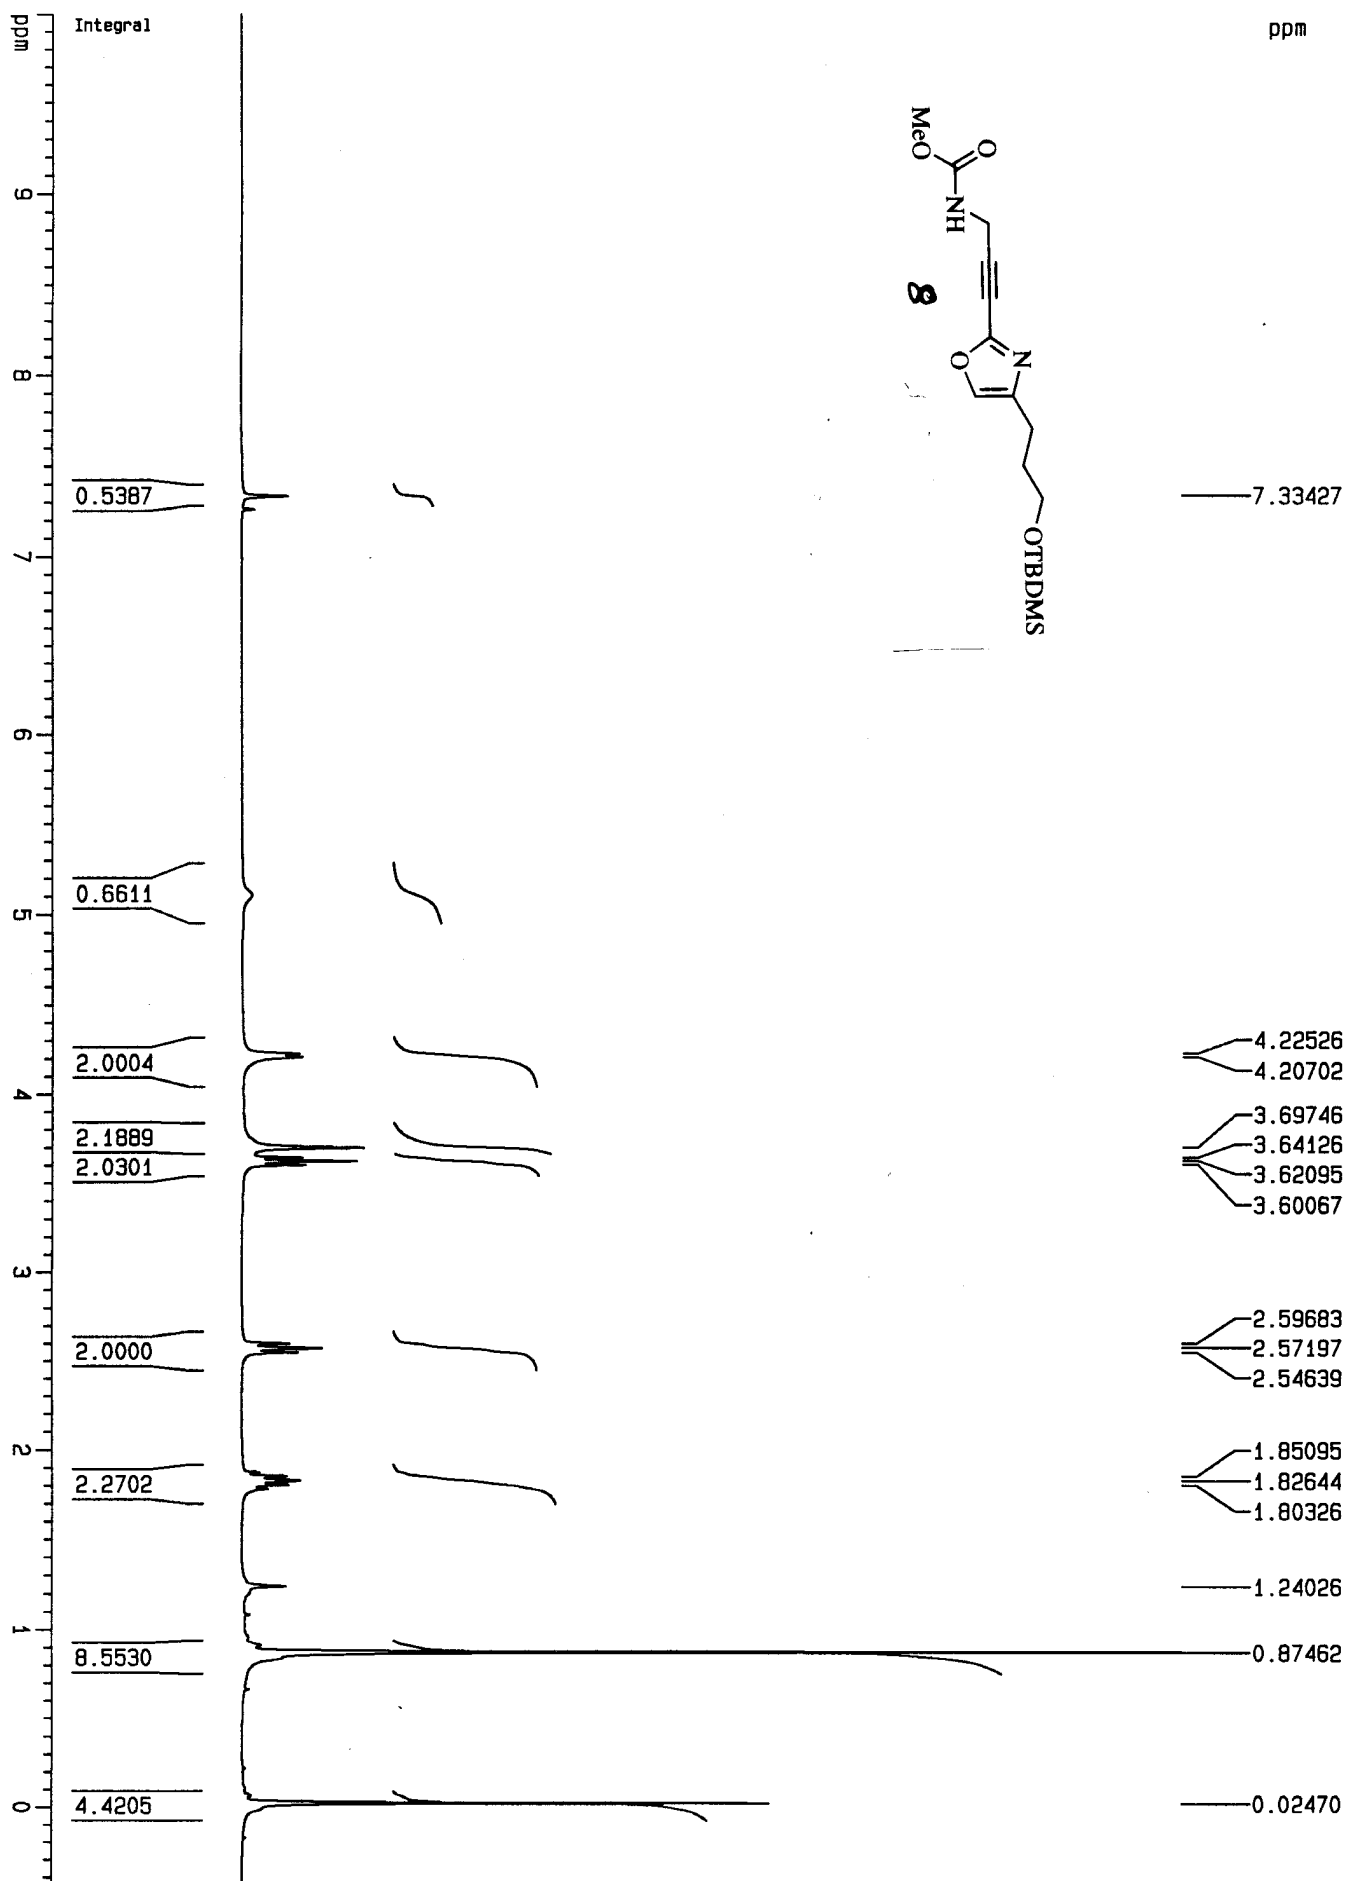



ppm

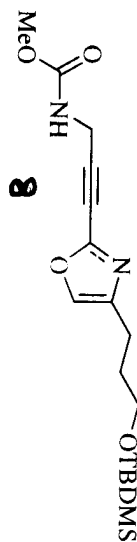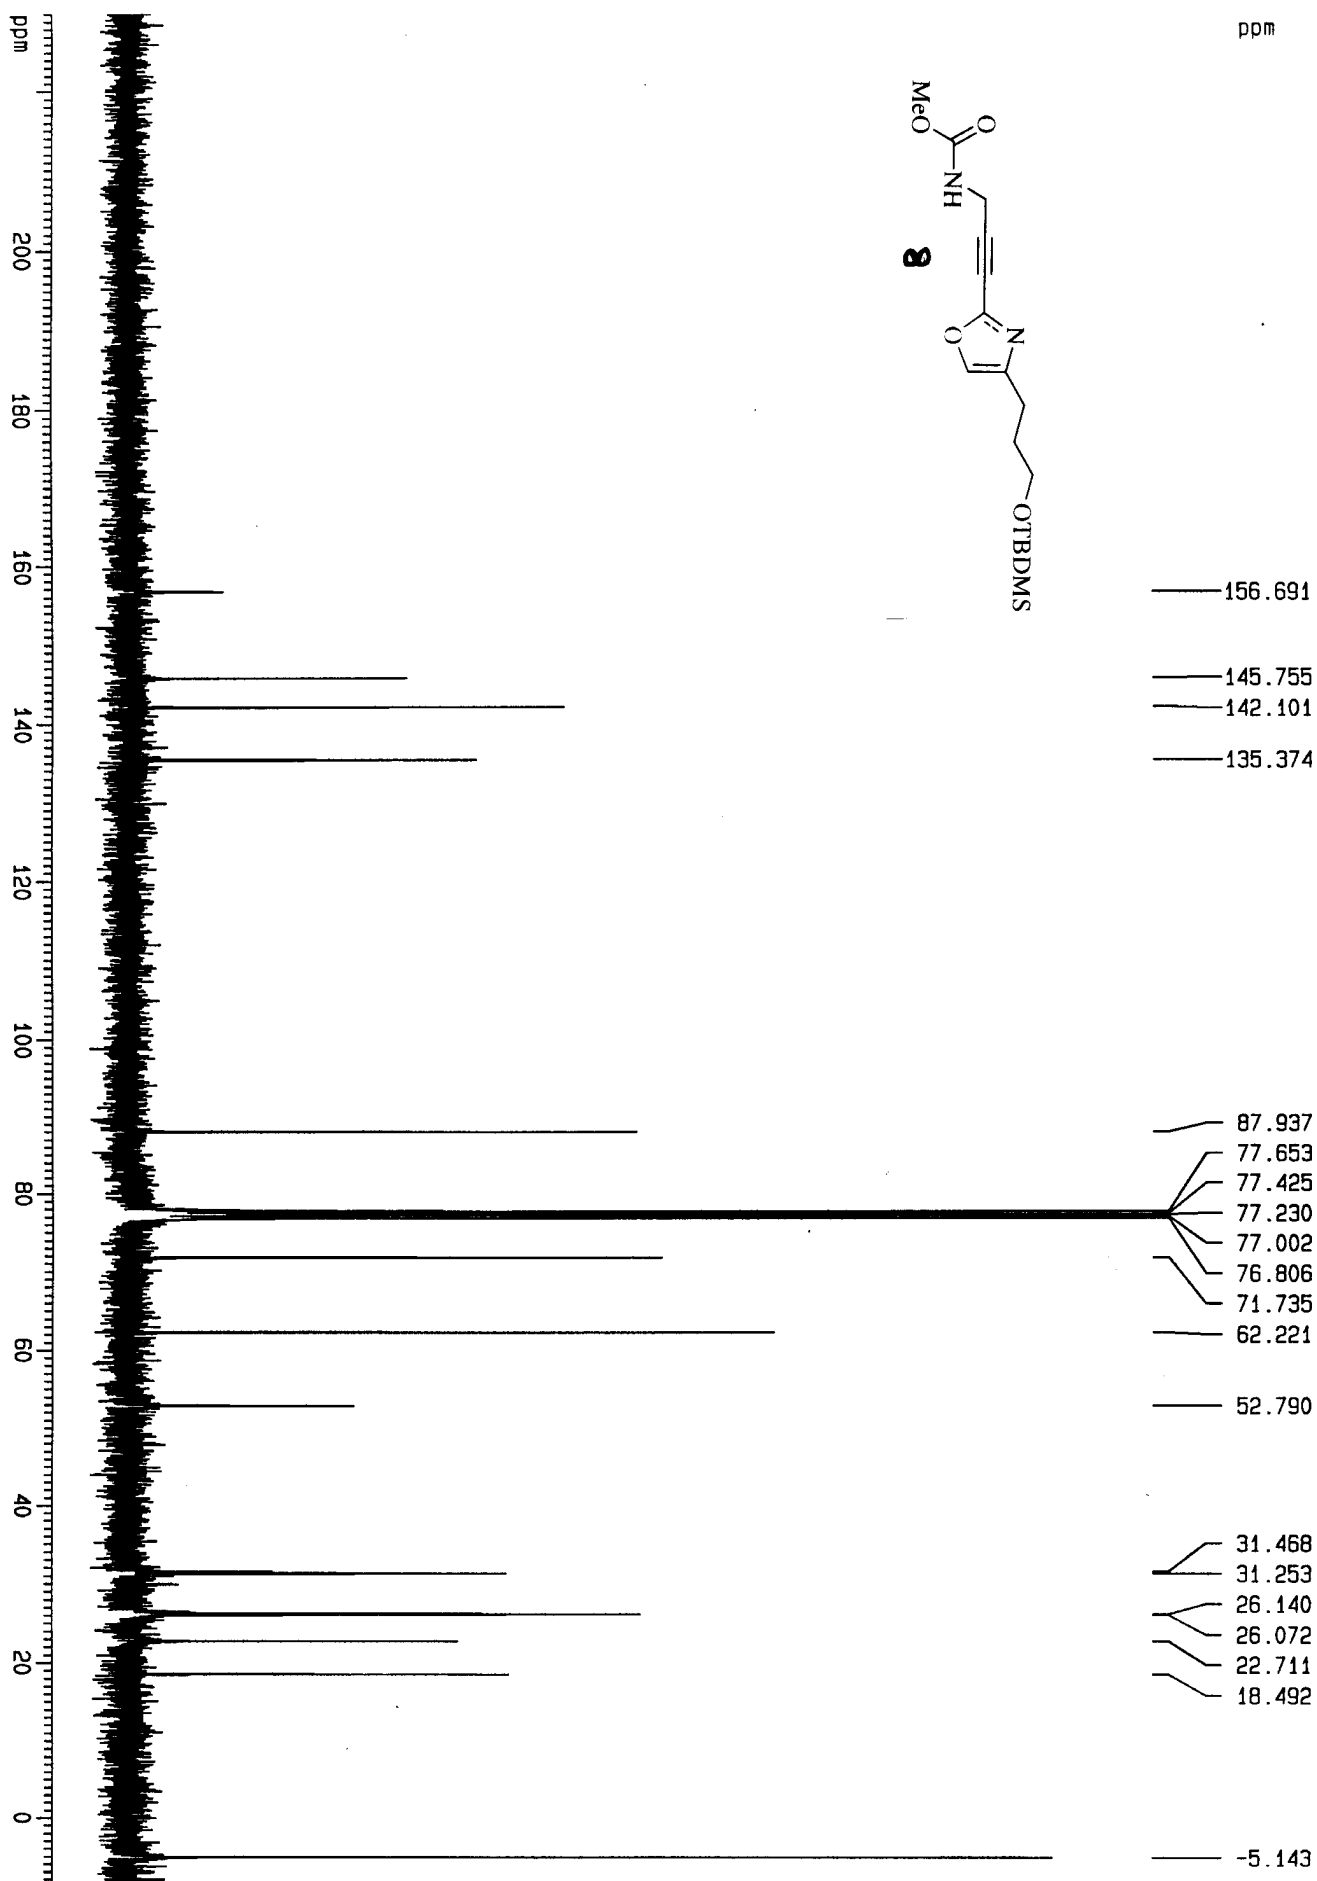

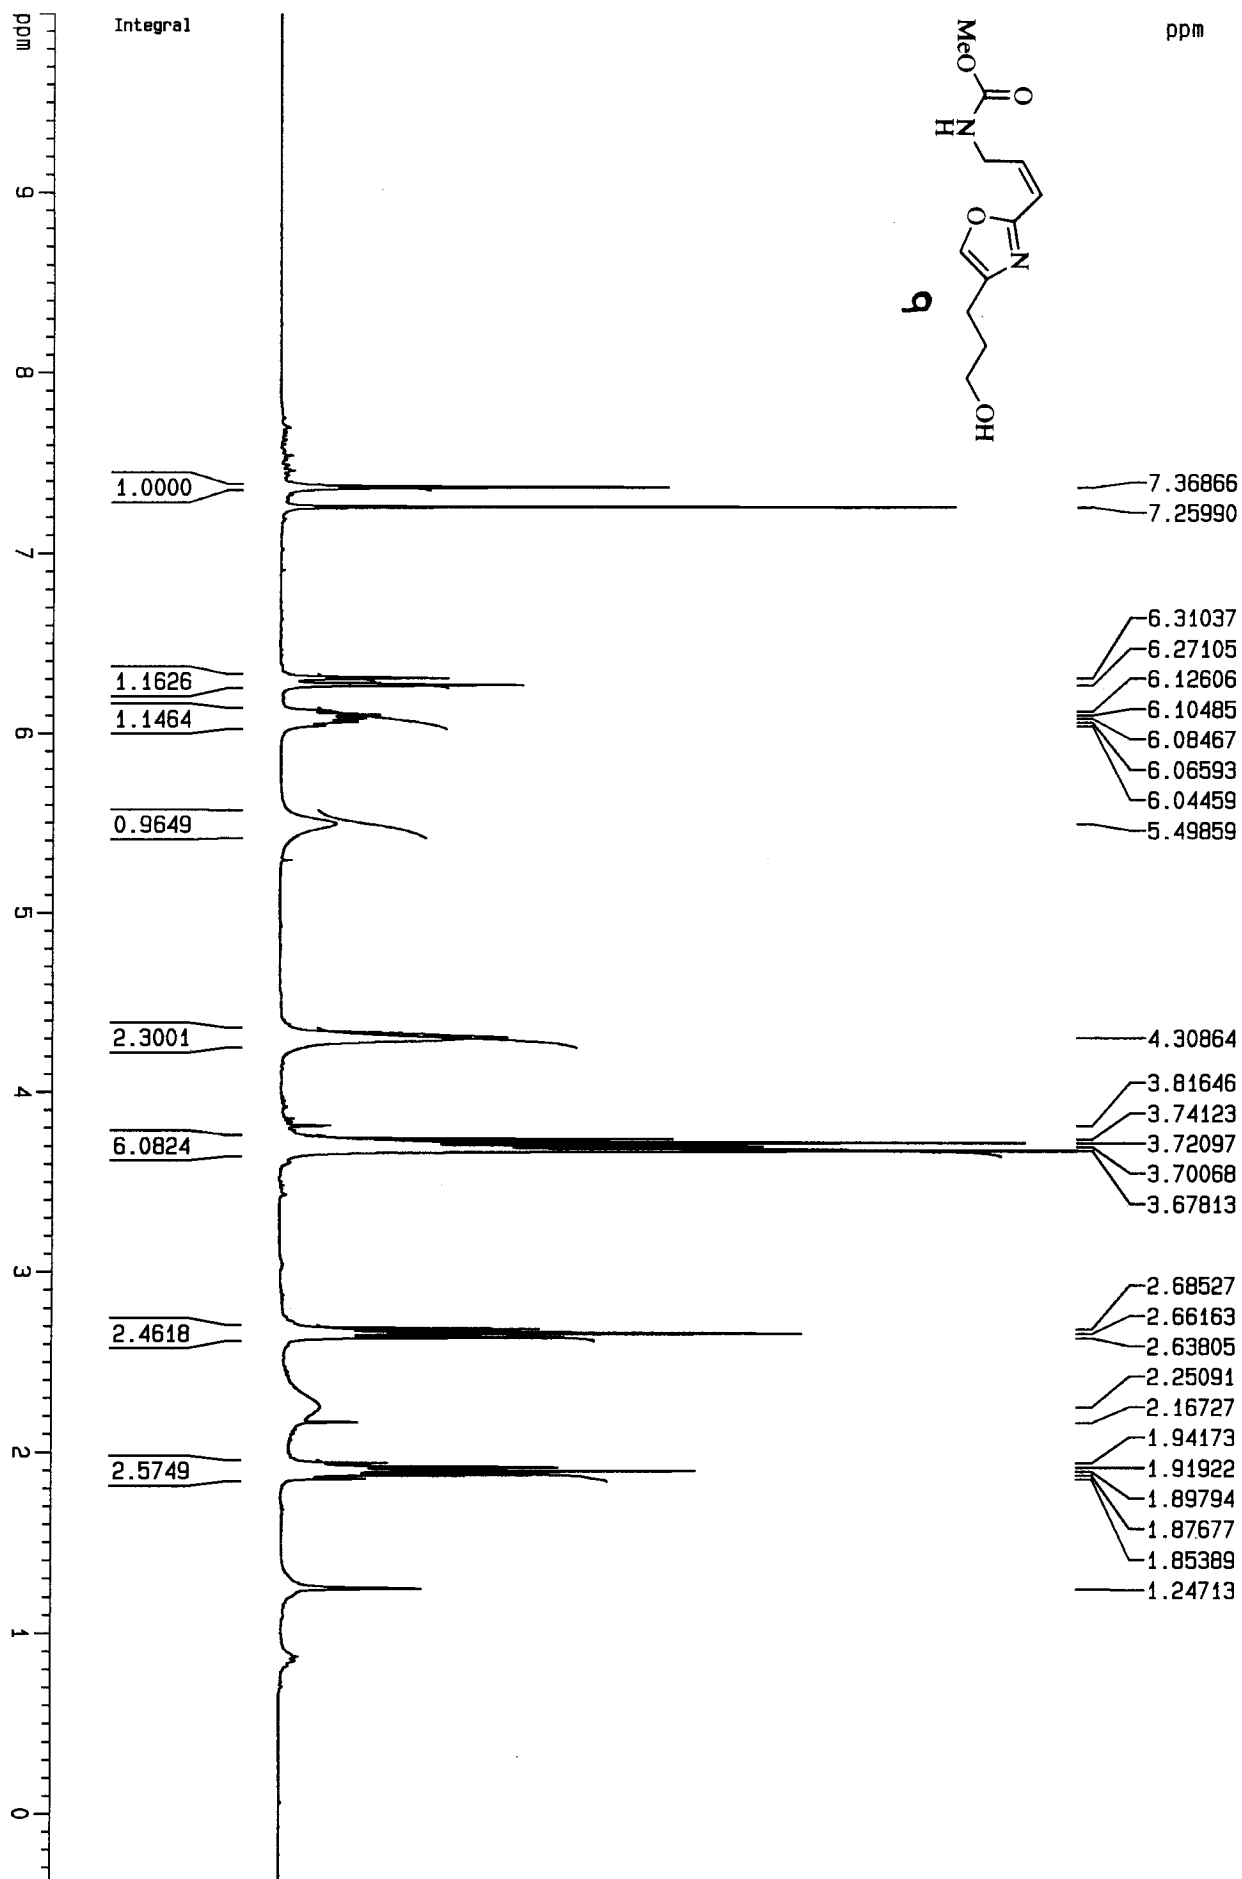

ppm

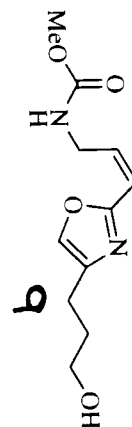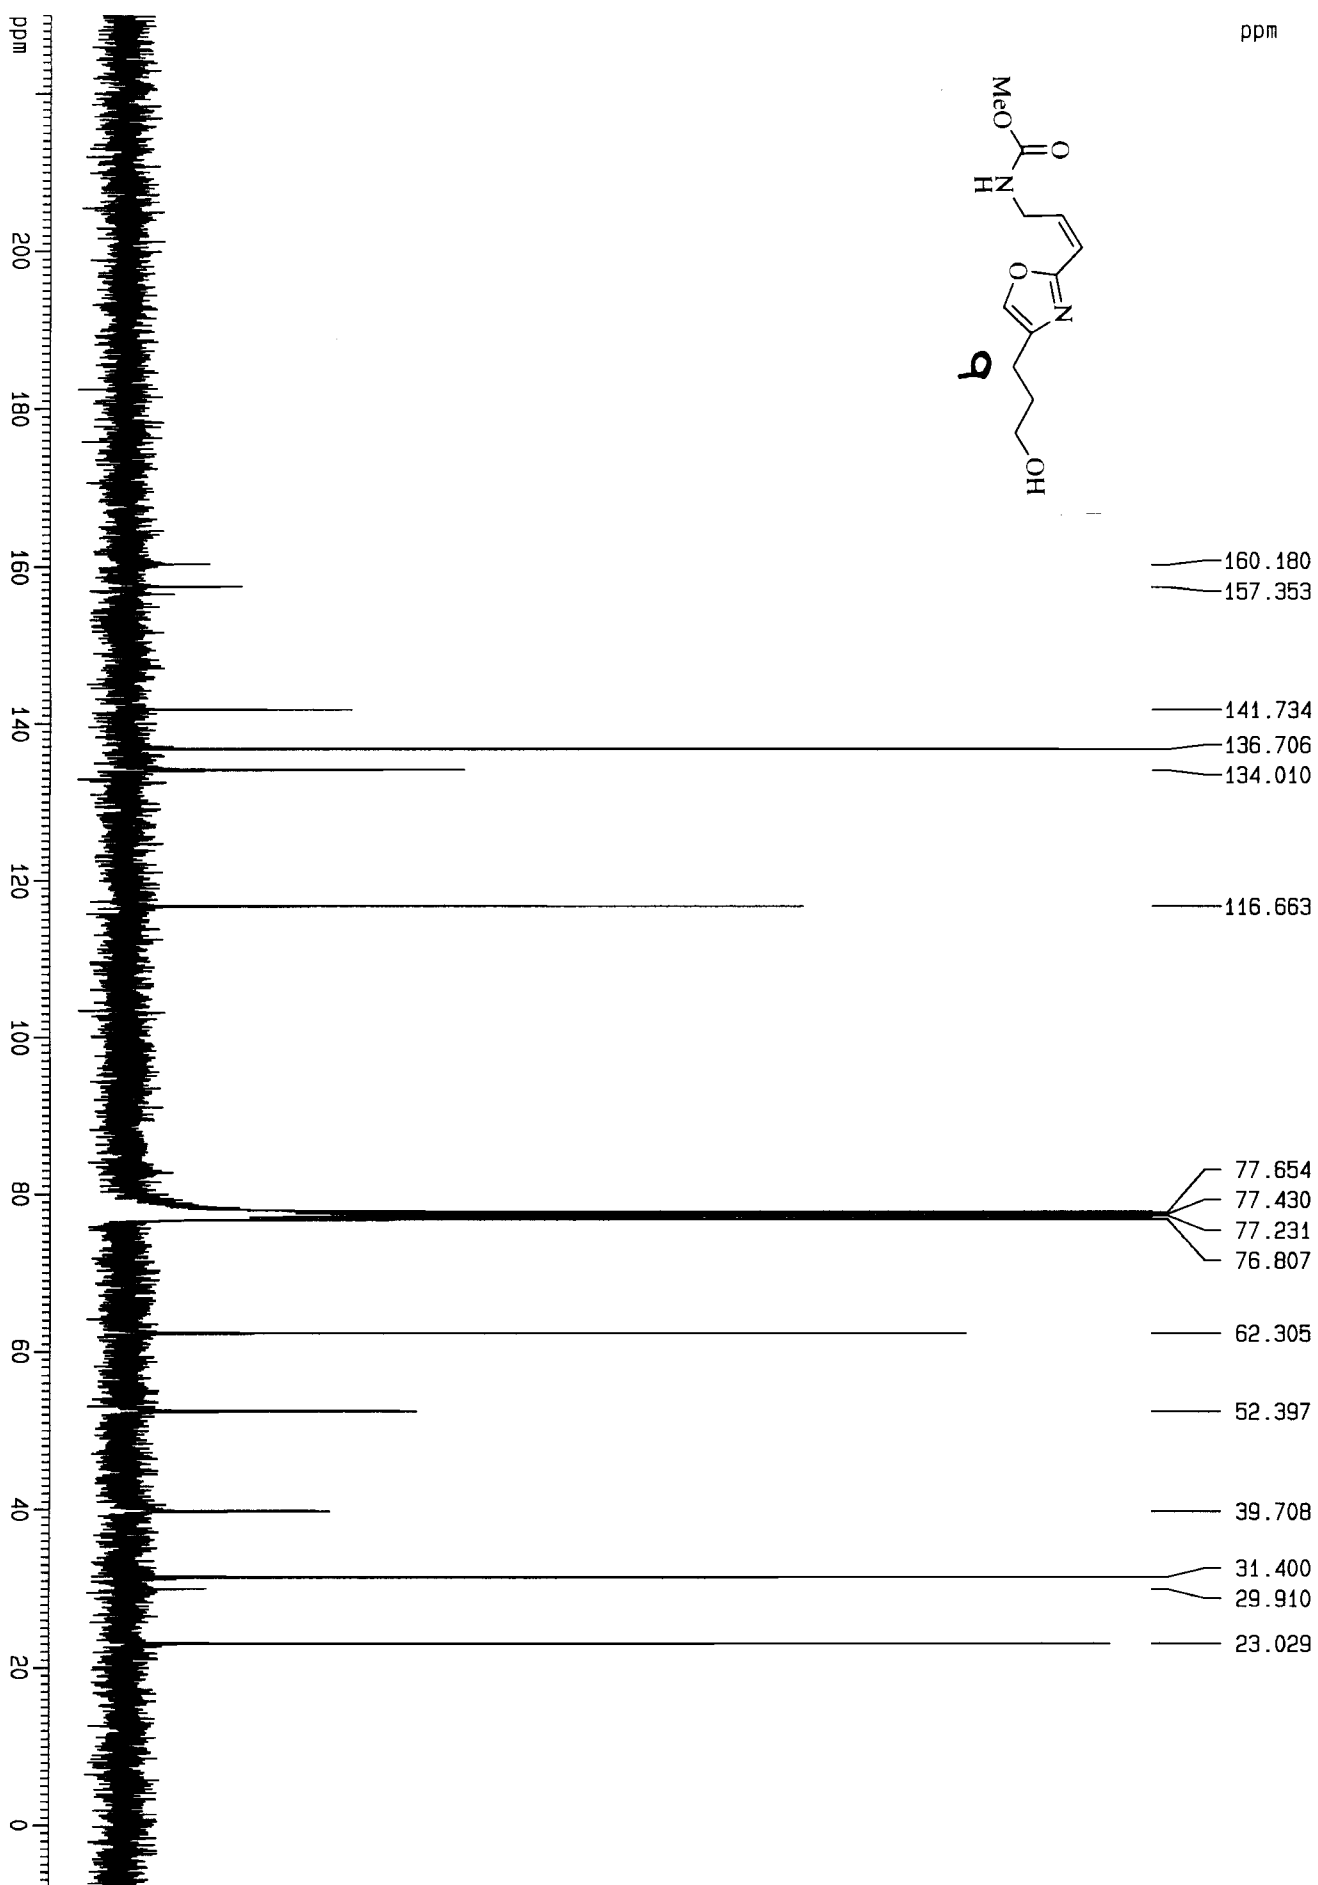

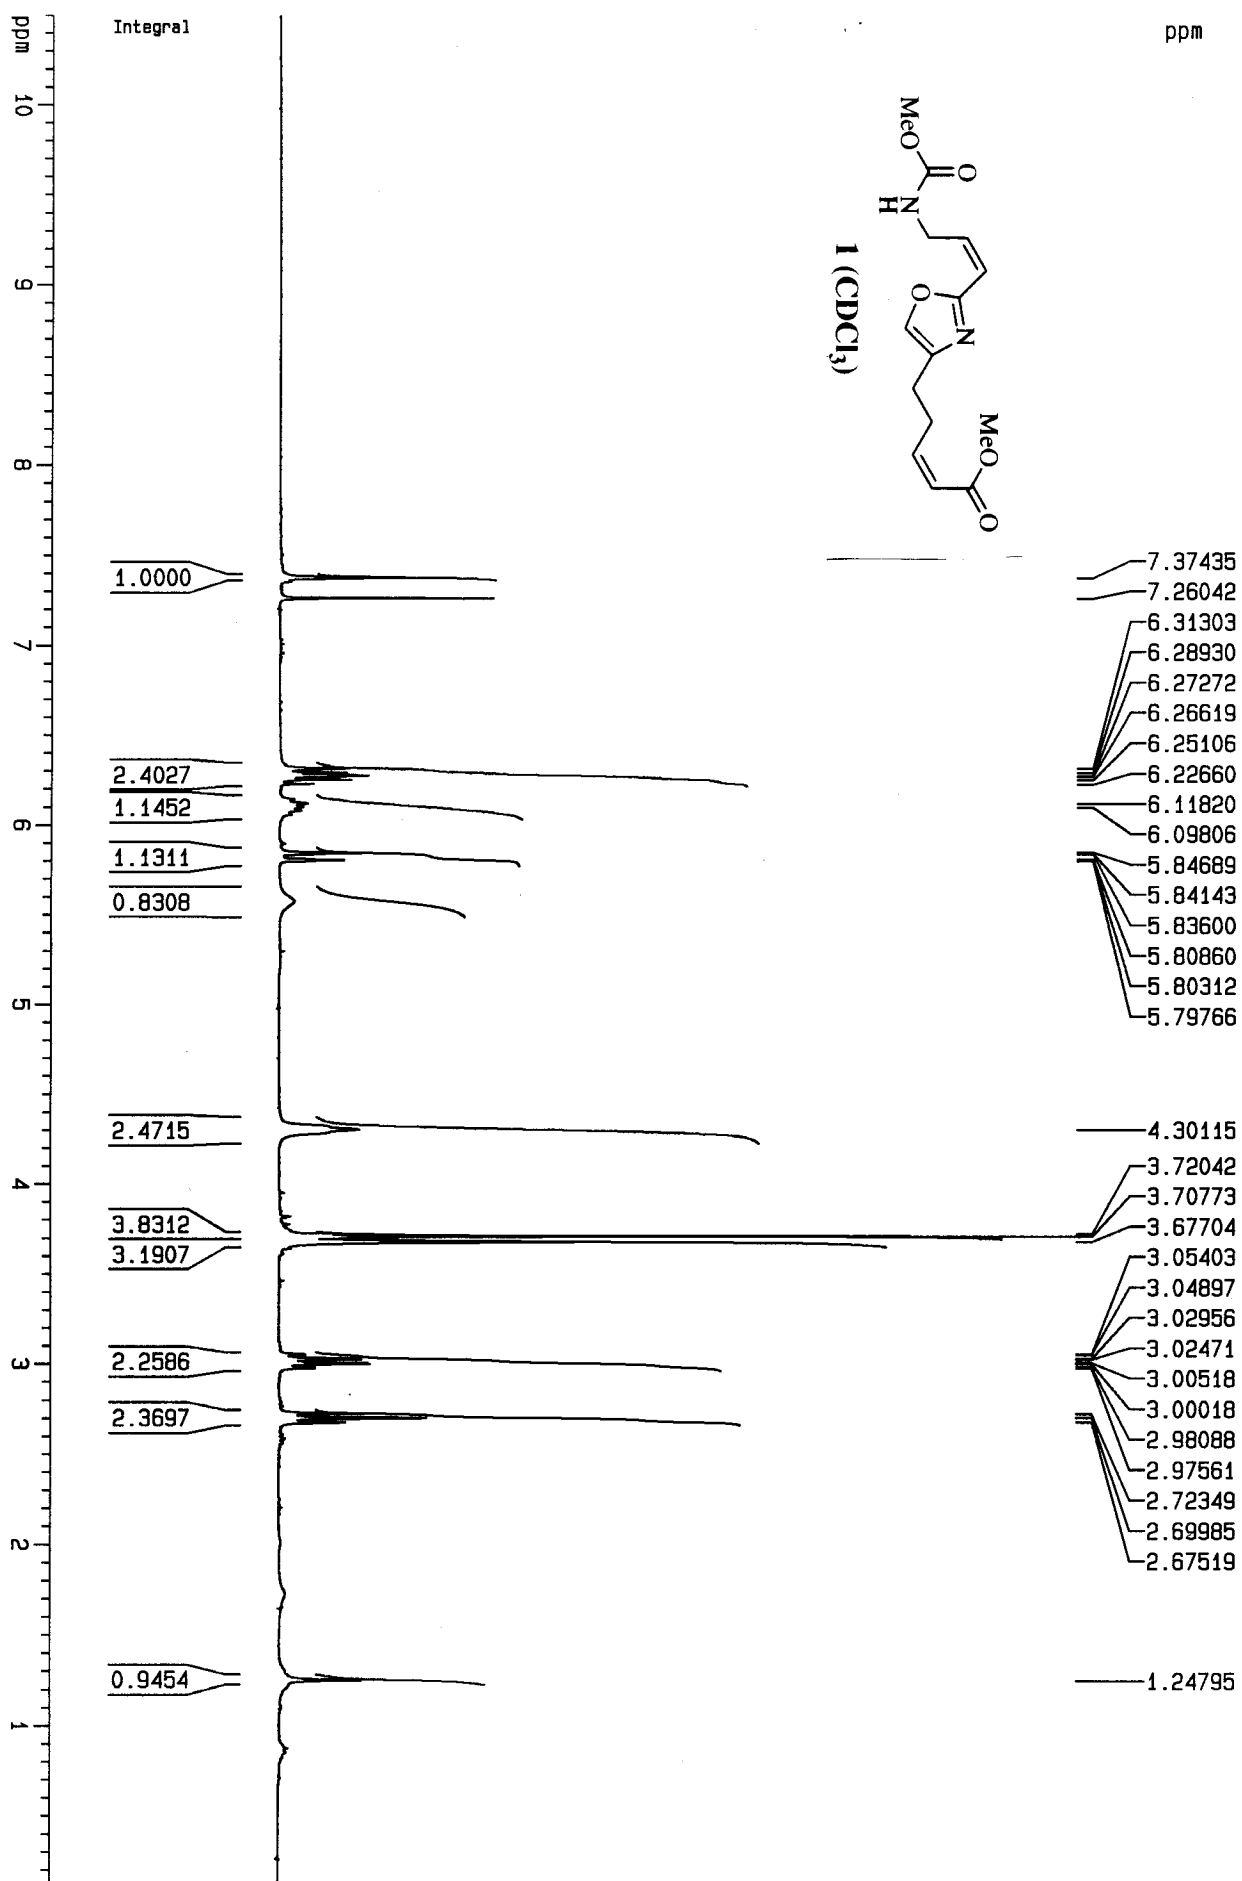

ppm

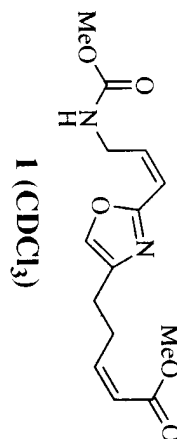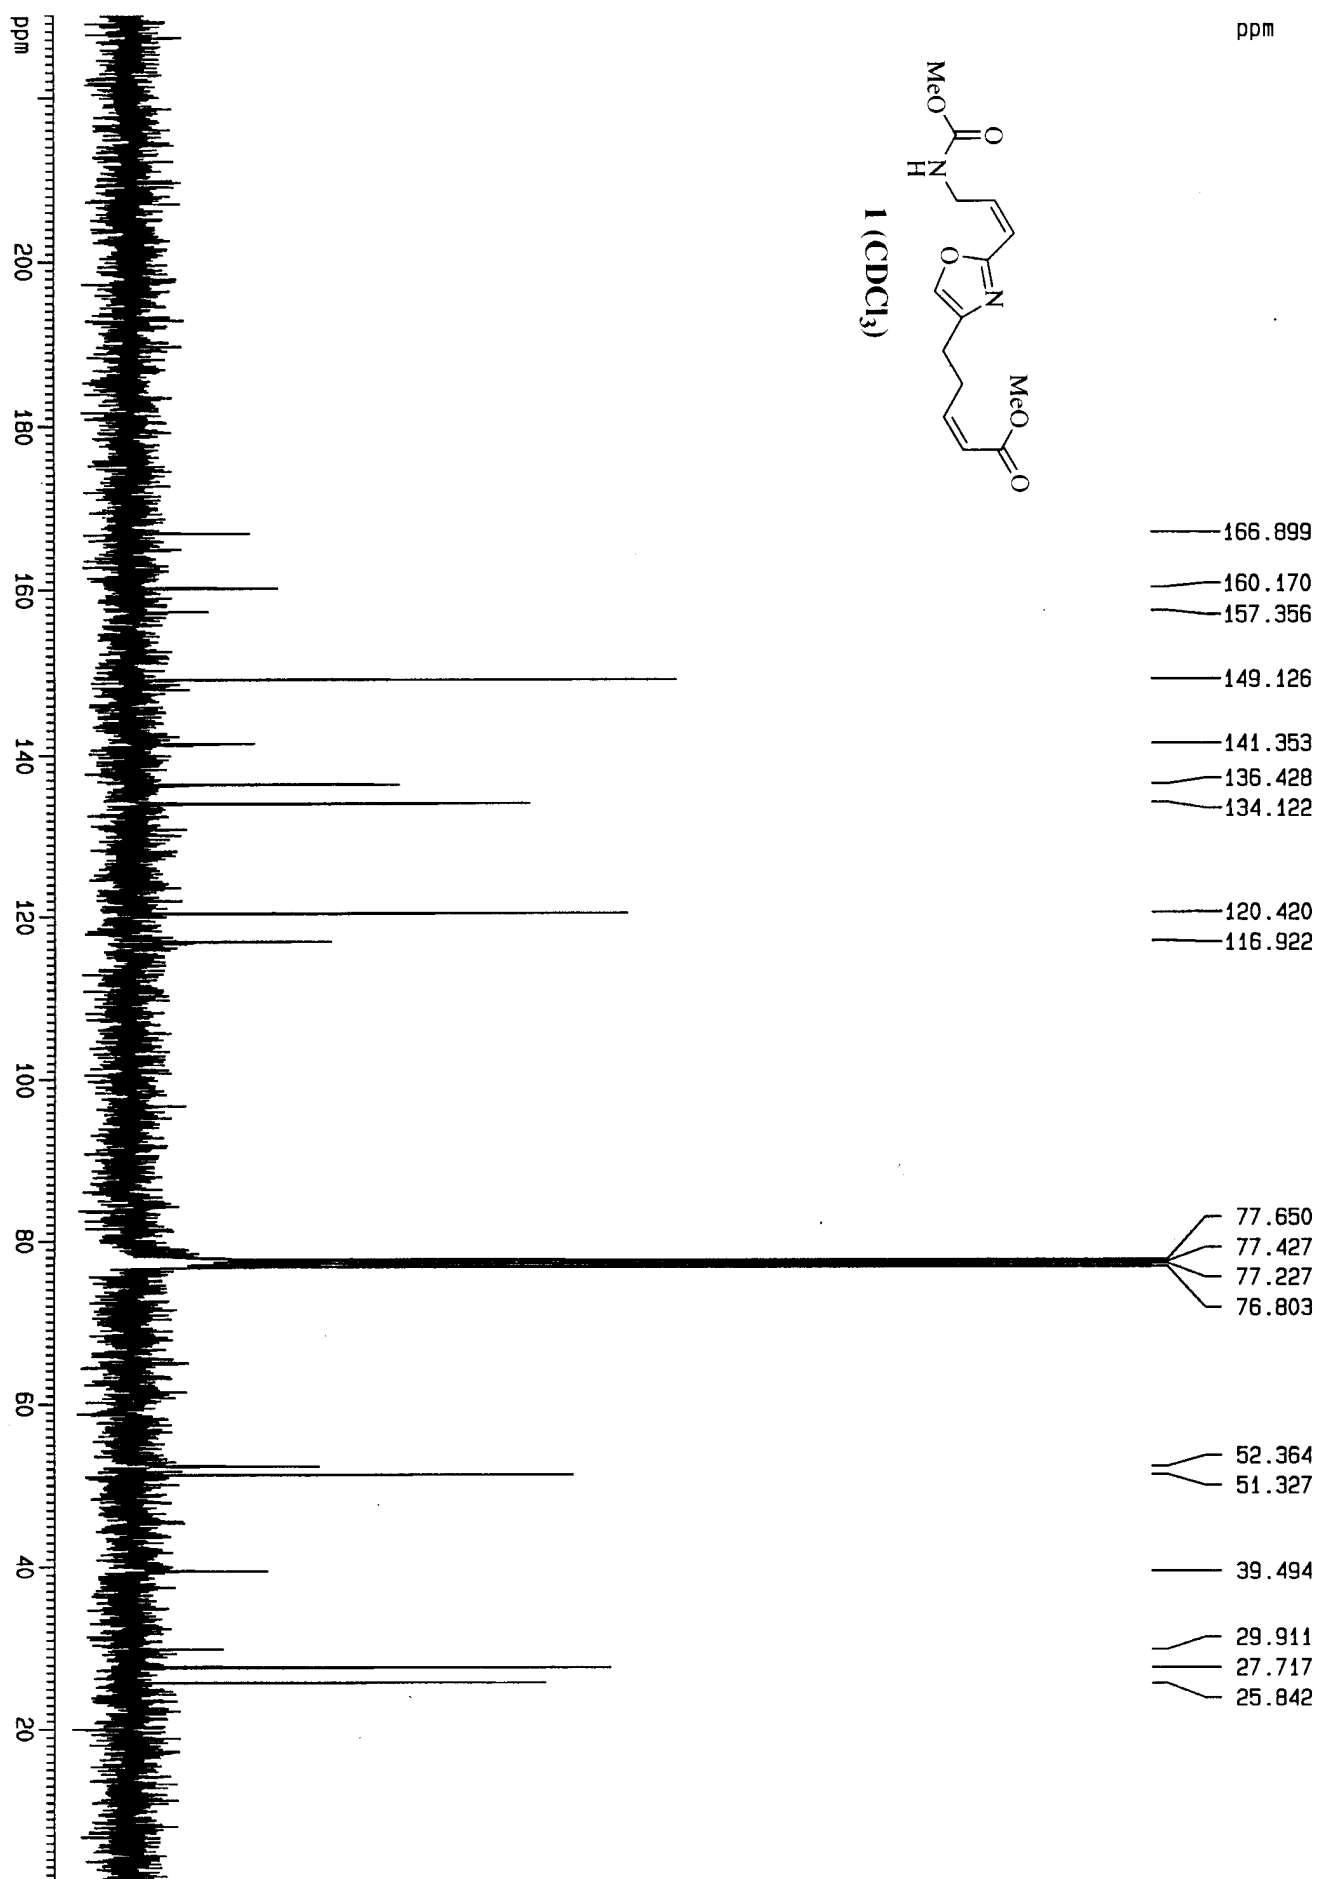

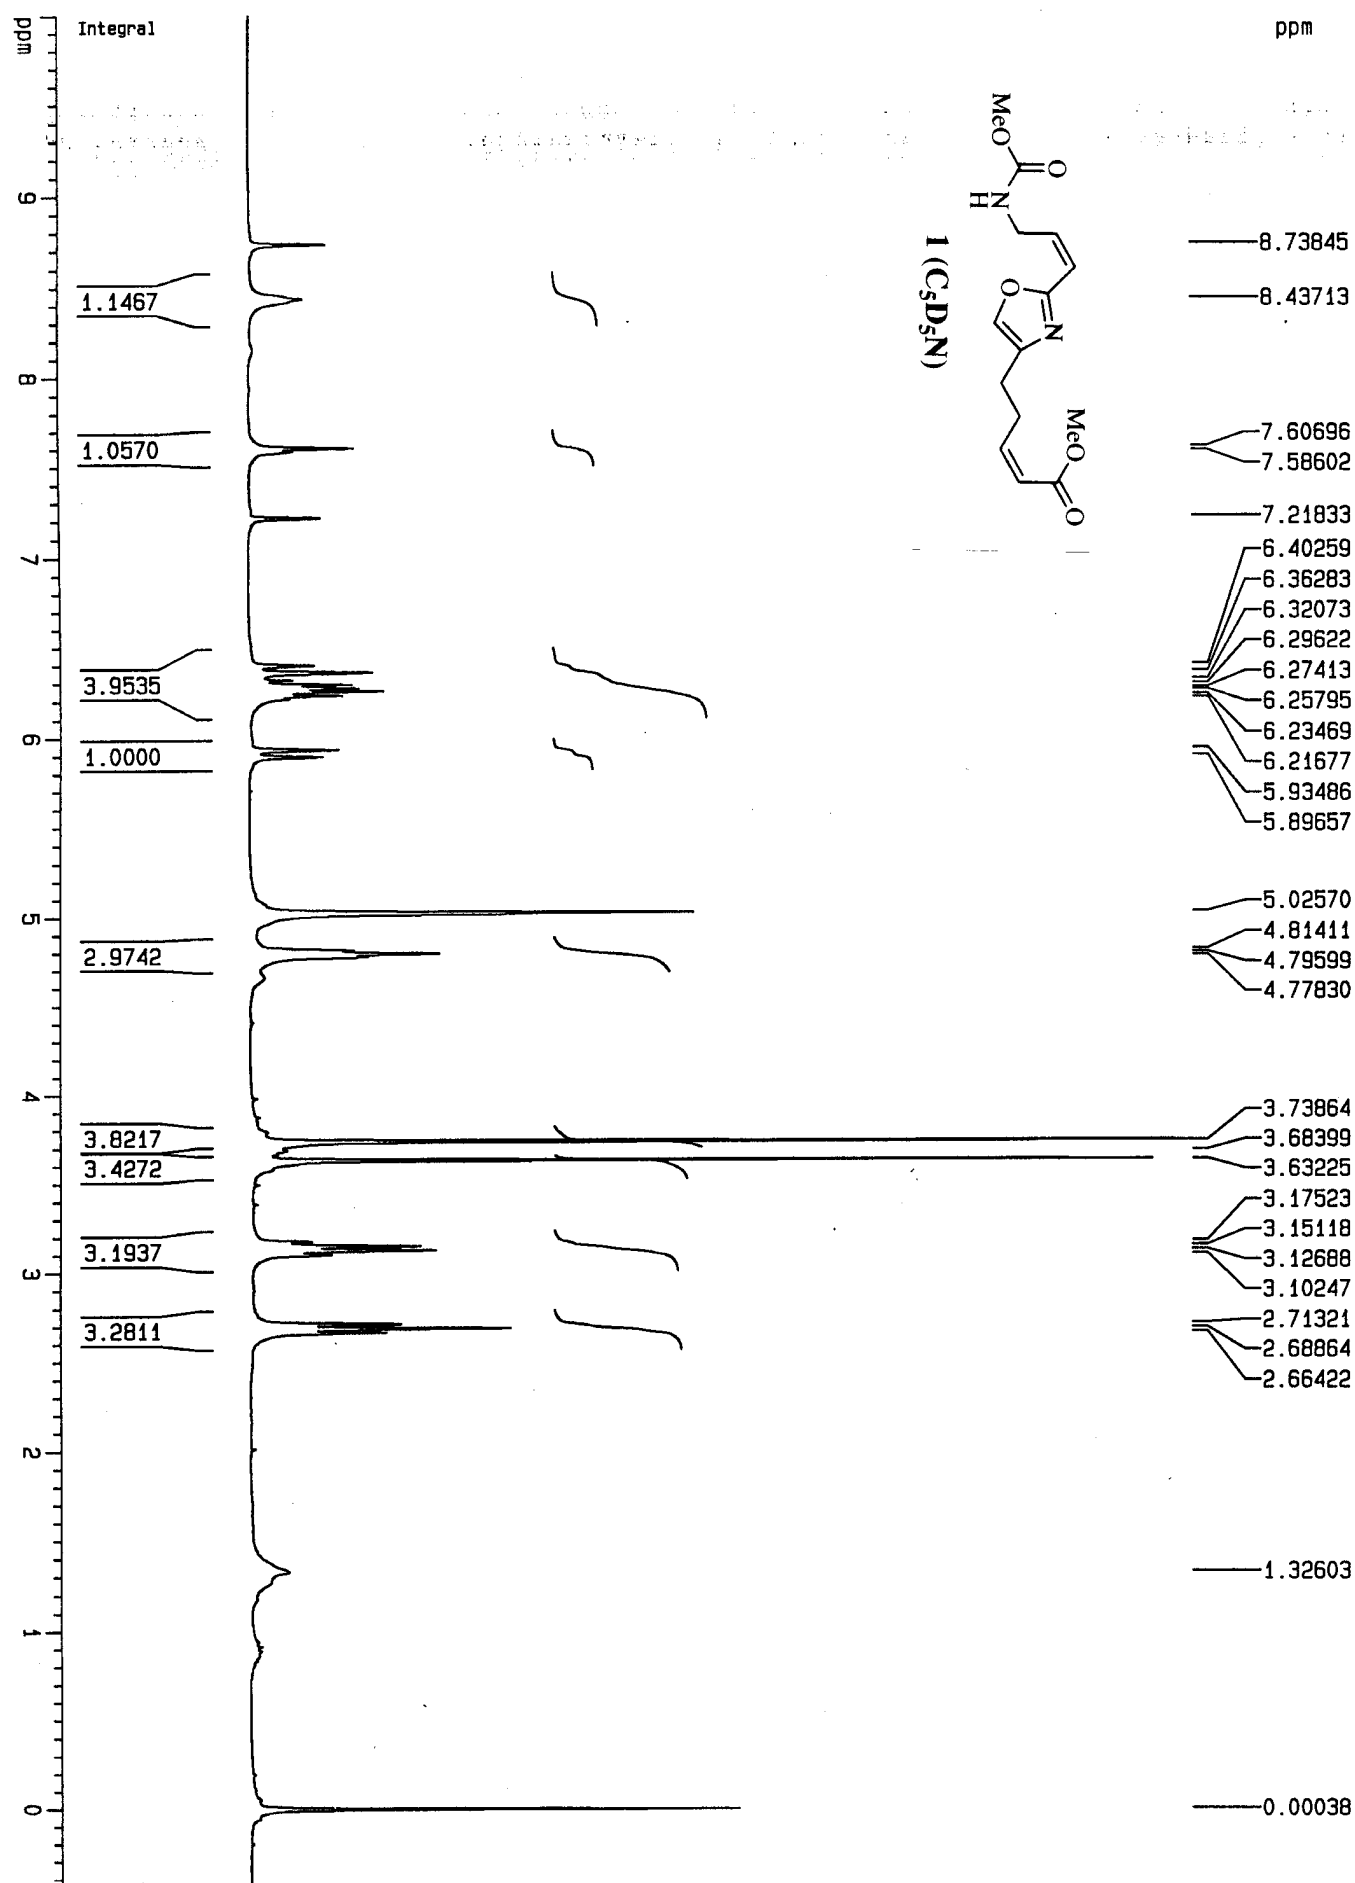

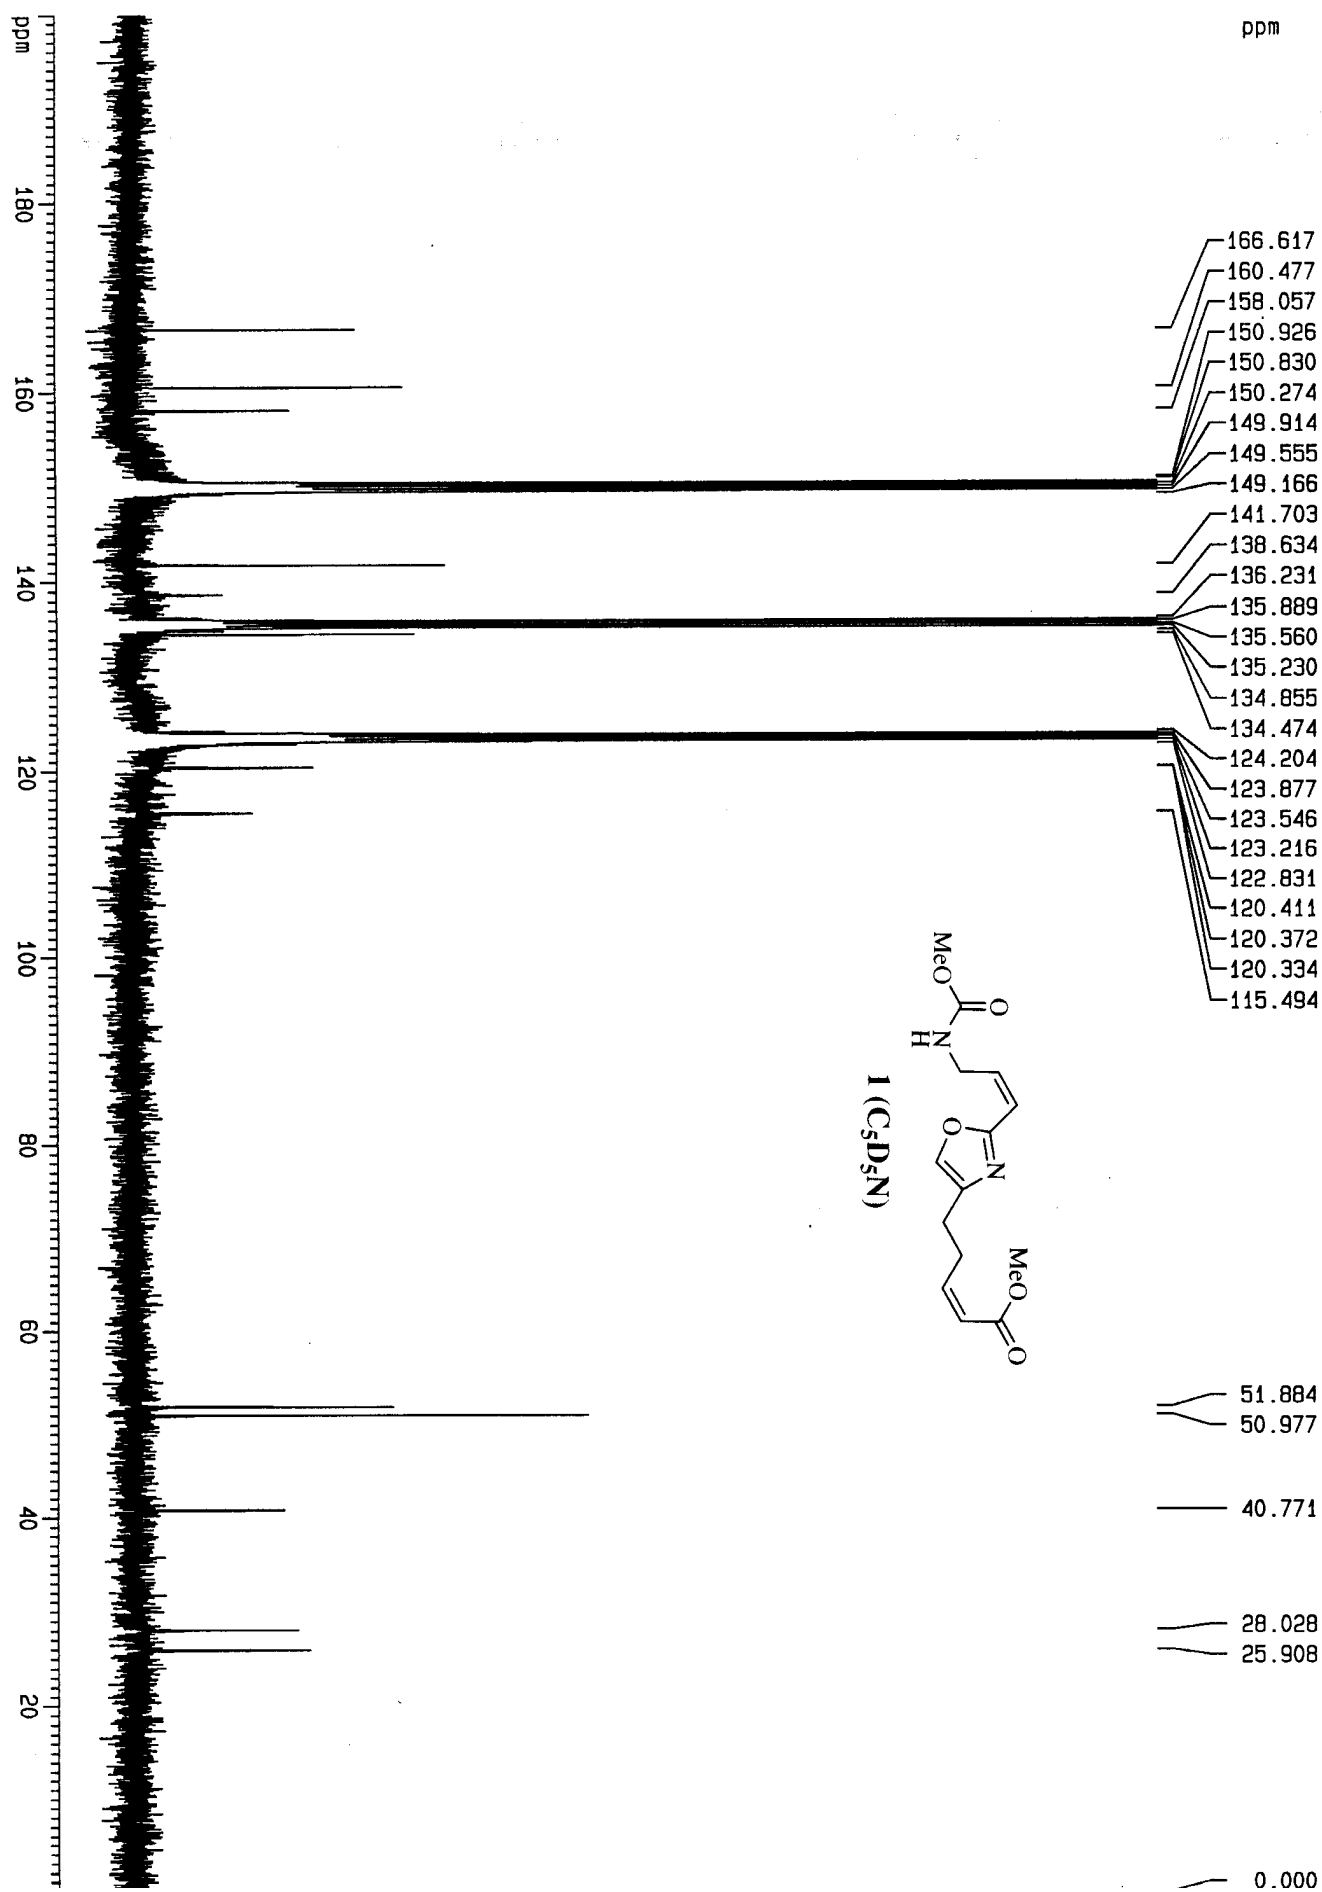

Supplement: Supplementary file 1 [file 5779110]
